# Supplementary material for: Sensitive and selective amplified detection of silver ion based on NEase-aided target recycling
Source: Royal Society of Chemistry journal article supplement (doi:10.1039/c5ra12544h), 2015-01-01
Supplement: c5ra12544h1.pdf [file c5ra12544h1.pdf]

Supplementary information for:

**Sensitive and selective amplified detection of silver ion  
based on NEase-aided target recycling**

Kai Zhang,\* Ke Wang, Xue Zhu, and Minhao Xie

Key Laboratory of Nuclear Medicine, Ministry of Health, Jiangsu Key Laboratory of  
Molecular Nuclear Medicine, Jiangsu Institute of Nuclear Medicine. Wuxi, Jiangsu  
214063, China.

\* To whom correspondence should be addressed. E-mail:zhangkai@jsinm.org (K.  
Zhang).

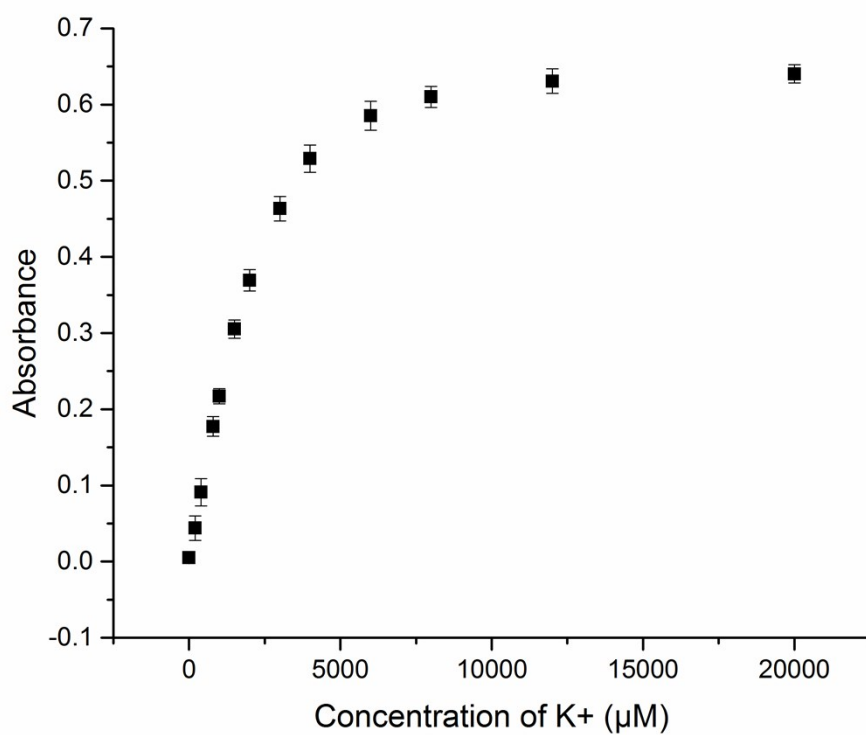

**Fig. S1.** The relationship between the absorption intensity and the concentrations of the  $K^+$ . The error bars represent relative standard deviations for three independent measurements.
